# Supplementary material for: Genome-wide meta-analysis of 158,000 individuals of European ancestry identifies three loci associated with chronic back pain
Source: PubMed Central journal article supplement (PMC6159857; doi:10.1371/journal.pgen.1007601), 2018-09-27

| Cohort             | OR[CI]                  | P               |
|--------------------|-------------------------|-----------------|
| CHS                | 1.21[0.95,1.47]         | 0.146           |
| Dalmatians-Korcula | 0.96[0.54, 1.38]        | 0.856           |
| Dalmatians-Vis     | 0.99[0.33, 1.65]        | 0.984           |
| FHS                | 1.14[0.95, 1.33]        | 0.184           |
| GenScot            | 1.12[1, 1.24]           | 0.0546          |
| JoCo               | 0.95[0.61, 1.29]        | 0.772           |
| Mr.OS-GBG          | 0.96[0.55, 1.37]        | 0.847           |
| Mr.OS-Malmo        | 1.24[0.9, 1.58]         | 0.216           |
| Mr.OS-US           | 1.11[0.94, 1.28]        | 0.221           |
| OAI                | 0.88[0.64, 1.13]        | 0.33            |
| RS-1               | 1.11[0.97, 1.25]        | 0.138           |
| RS-2               | 1.05[0.83, 1.26]        | 0.674           |
| RS-3               | 1.02[0.87, 1.18]        | 0.758           |
| SOF                | 1.15[0.98, 1.33]        | 0.11            |
| TwinsUK            | 1.08[0.92, 1.23]        | 0.356           |
| UKB                | 1.08[1.05, 1.11]        | 1.32e-07        |
| <b>Summary</b>     | <b>1.08[1.06, 1.11]</b> | <b>7.18e-10</b> |

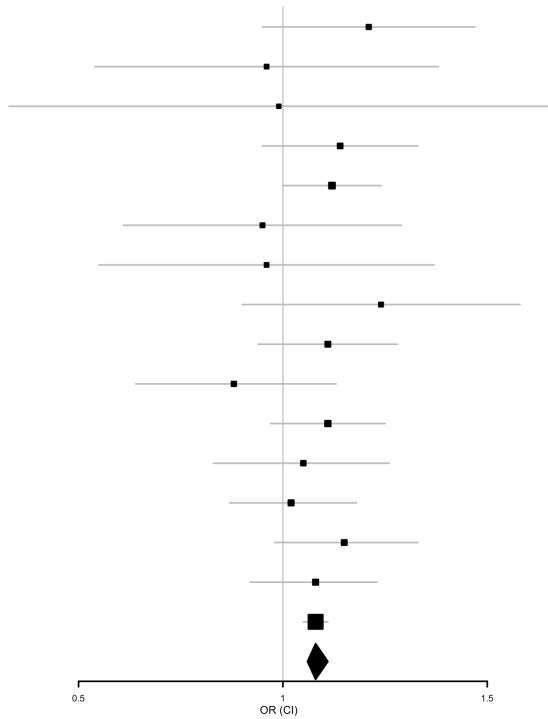

Supplement: pgen.1007601.s012.pdf [file pgen.1007601.s012.pdf]
