# Supplementary material for: Genome-wide meta-analysis of 158,000 individuals of European ancestry identifies three loci associated with chronic back pain
Source: PubMed Central journal article supplement (PMC6159857; doi:10.1371/journal.pgen.1007601), 2018-09-27

| Cohort             | OR[CI]                 | P               |
|--------------------|------------------------|-----------------|
| CHS                | 1[0.84,1.15]           | 0.946           |
| Dalmatians-Korcula | 0.88[0.62,1.14]        | 0.323           |
| Dalmatians-Vis     | 1.27[0.81,1.72]        | 0.307           |
| FHS                | 0.99[0.85,1.12]        | 0.855           |
| GenScot            | 1.03[0.94,1.12]        | 0.53            |
| JoCo               | 1.01[0.73,1.29]        | 0.932           |
| Mr.OS-GBG          | 1.12[0.81,1.42]        | 0.486           |
| Mr.OS-Malmo        | 0.87[0.59,1.15]        | 0.327           |
| Mr.OS-US           | 0.89[0.77,1.01]        | 0.0565          |
| OAI                | 0.84[0.68,1.01]        | 0.0418          |
| RS-1               | 0.87[0.77,0.98]        | 0.0111          |
| RS-2               | 1.1[0.94,1.25]         | 0.232           |
| RS-3               | 0.99[0.88,1.1]         | 0.822           |
| SOF                | 0.97[0.84,1.1]         | 0.66            |
| TwinsUK            | 0.91[0.79,1.03]        | 0.124           |
| UKB                | 0.95[0.92,0.97]        | 8.74e-07        |
| <b>Summary</b>     | <b>0.95[0.93,0.97]</b> | <b>7.66e-08</b> |

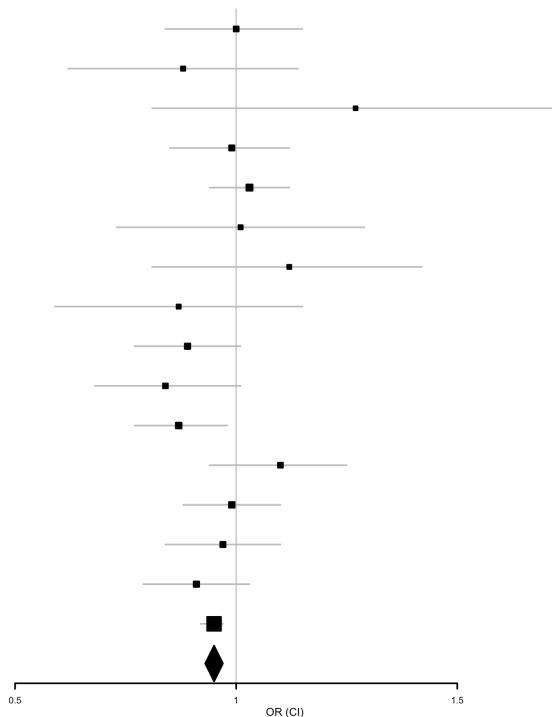

Supplement: pgen.1007601.s014.pdf [file pgen.1007601.s014.pdf]
