# Supplementary material for: Genome-wide meta-analysis of 158,000 individuals of European ancestry identifies three loci associated with chronic back pain
Source: PubMed Central journal article supplement (PMC6159857; doi:10.1371/journal.pgen.1007601), 2018-09-27

Plotted SNPs

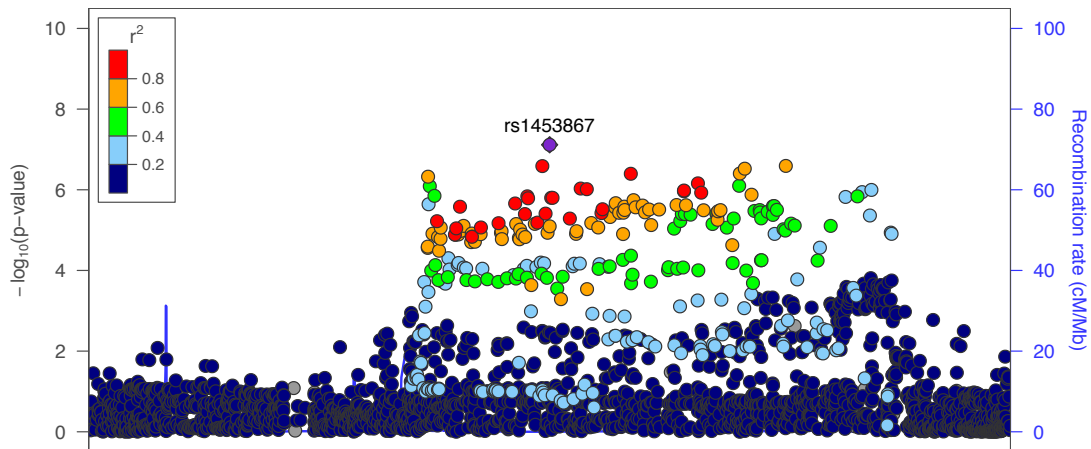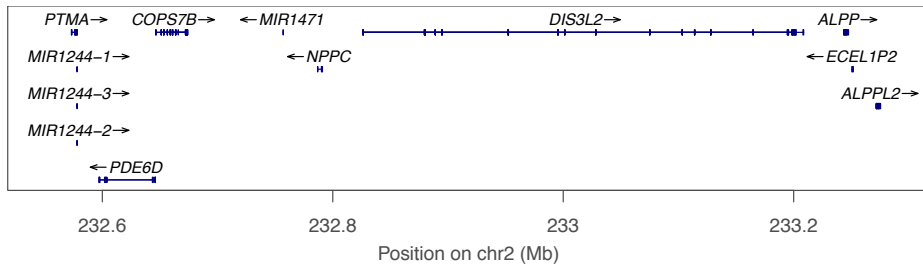

Supplement: pgen.1007601.s015.pdf [file pgen.1007601.s015.pdf]
