# Supplementary material for: Genome-wide meta-analysis of 158,000 individuals of European ancestry identifies three loci associated with chronic back pain
Source: PubMed Central journal article supplement (PMC6159857; doi:10.1371/journal.pgen.1007601), 2018-09-27

| Cohort             | OR[CI]                 | P               |
|--------------------|------------------------|-----------------|
| CHS                | 1.02[0.85,1.2]         | 0.796           |
| Dalmatians-Korcula | 1.35[1.06,1.64]        | 0.0427          |
| Dalmatians-Vis     | 0.74[0.23,1.25]        | 0.253           |
| FHS                | 1.19[1.03,1.35]        | 0.0288          |
| GenScot            | 0.98[0.88,1.09]        | 0.77            |
| JoCo               | 0.95[0.63,1.26]        | 0.746           |
| Mr.OS-GBG          | 1.17[0.81,1.52]        | 0.393           |
| Mr.OS-Malmo        | 0.91[0.58,1.23]        | 0.559           |
| Mr.OS-US           | 1.02[0.88,1.16]        | 0.752           |
| OAI                | 1.11[0.92,1.31]        | 0.291           |
| RS-1               | 1.07[0.95,1.19]        | 0.274           |
| RS-2               | 1.05[0.88,1.23]        | 0.562           |
| RS-3               | 1.12[0.99,1.24]        | 0.0776          |
| SOF                | 1.02[0.87,1.17]        | 0.79            |
| TwinsUK            | 1.07[0.93,1.21]        | 0.343           |
| UKB                | 1.06[1.04,1.09]        | 2.7e-06         |
| <b>Summary</b>     | <b>1.06[1.04,1.08]</b> | <b>1.01e-07</b> |

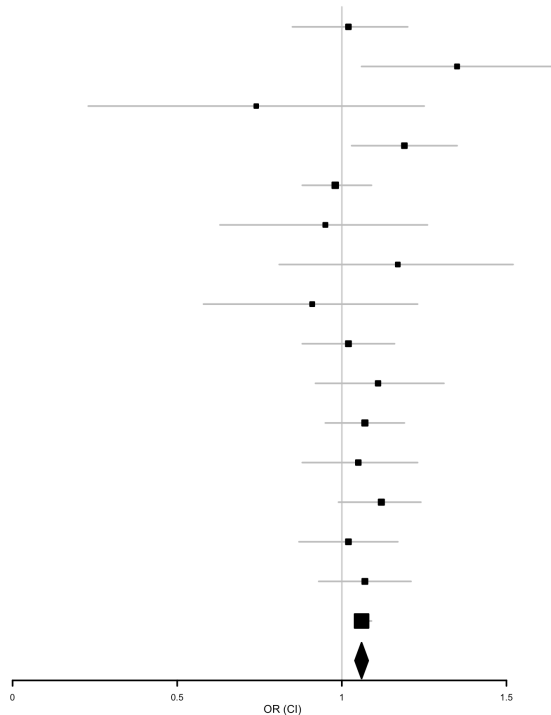

Supplement: pgen.1007601.s016.pdf [file pgen.1007601.s016.pdf]
