# Supplementary material for: Genome-wide meta-analysis of 158,000 individuals of European ancestry identifies three loci associated with chronic back pain
Source: PubMed Central journal article supplement (PMC6159857; doi:10.1371/journal.pgen.1007601), 2018-09-27

| Cohort             | OR[CI]                 | P               |
|--------------------|------------------------|-----------------|
| CHS                | 0.95[0.8,1.11]         | 0.548           |
| Dalmatians-Korcula | 0.91[0.67,1.15]        | 0.448           |
| Dalmatians-Vis     | 1.23[0.8,1.66]         | 0.351           |
| FHS                | 1.11[0.97,1.25]        | 0.155           |
| GenScot            | 0.95[0.86,1.04]        | 0.218           |
| JoCo               | 1.02[0.76,1.28]        | 0.884           |
| Mr.OS-GBG          | 0.77[0.48,1.06]        | 0.0808          |
| Mr.OS-Malmo        | 0.89[0.62,1.15]        | 0.378           |
| Mr.OS-US           | 0.94[0.82,1.06]        | 0.341           |
| OAI                | 1[0.84,1.16]           | 0.968           |
| RS-1               | 0.97[0.87,1.07]        | 0.618           |
| RS-2               | 0.93[0.78,1.07]        | 0.318           |
| RS-3               | 0.94[0.83,1.04]        | 0.212           |
| SOF                | 0.95[0.83,1.08]        | 0.448           |
| TwinsUK            | 0.98[0.86,1.09]        | 0.701           |
| UKB                | 0.95[0.93,0.97]        | 2.67e-06        |
| <b>Summary</b>     | <b>0.95[0.94,0.97]</b> | <b>3.15e-07</b> |

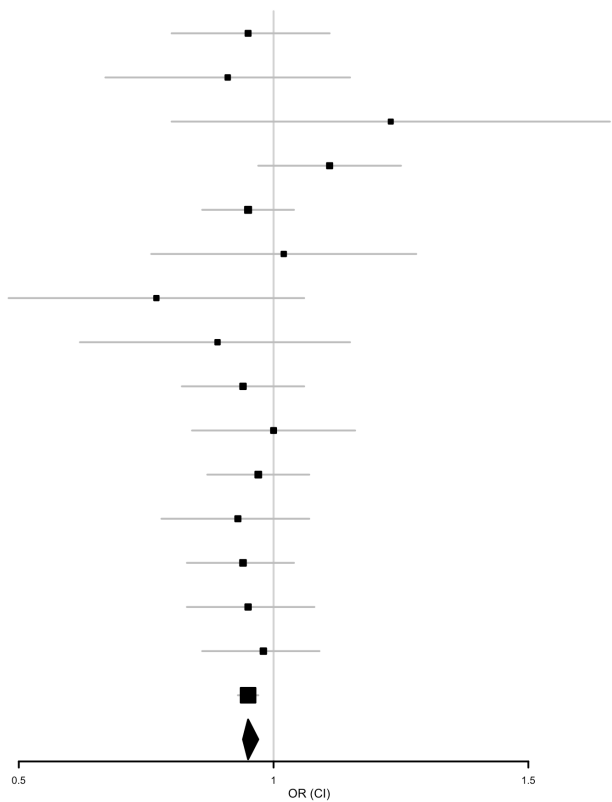

Supplement: pgen.1007601.s018.pdf [file pgen.1007601.s018.pdf]
